# Supplementary material for: NMR and UV studies of 3′-S-phosphorothiolate modified DNA in a DNA : RNA hybrid dodecamer duplex; implications for antisense drug design
Source: Royal Society of Chemistry journal article supplement (doi:10.1039/b311923h), 2003-12-18
Supplement: b311923h.doc [file b311923h.doc]

NMR and UV studies of 3’-*S*-phosphorothiolate modified DNA in a DNA:RNA hybrid dodecamer duplex; Implications for antisense drug design

Andrew P.G. Beevers,*a* Kevin J. Fettes*b*, Ghalia Sabbagh*b* , Fatima K. Murad*a*, John R.P. Arnold*c*, Richard Cosstick*b* and Julie Fisher**a*

***Supplementary Information***

***S1*.** Chemical shift assignments for (**2**) the non-modified DNA:RNA hybrida

|  | **Chemical shifts of protons/ppm** | | | | | | | | |
| --- | --- | --- | --- | --- | --- | --- | --- | --- | --- |
| **Residue** | **H1’** | **H2’** | **H2’’** | **H3’** | **H4’** | H5/Me/H2 | **H6/H8** | **Imino*** | **Amino*** |
| **C1** | 5.94 | 2.57 | 2.67 | 4.68 | 4.17 | 6.07 | 8.04 | - |  |
| **C2** | 6.07 | 2.42 | 2.71 | 4.80 | 4.33 | 5.69 | 7.81 | - | 7.08, 8.70 |
| **T3** | 6.03 | 2.36 | 2.72 | 4.96 | 4.28 | 1.64 | 7.63 | 13.31 | - |
| **A4** | 6.03 | 2.63 | 2.86 | 5.07 | 4.43 | 6.50 | 8.15 | - |  |
| **A5** | 5.98 | 2.66 | 2.80 | 5.03 | 4.45 | 7.02 | 7.96 | - |  |
| **A6** | 6.13 | 2.54 | 2.82 | 4.86 | 4.43 | 7.63 | 7.84 | - |  |
| **T7** | 5.92 | 2.11 | 2.58 | 4.79 | 4.24 | 1.19 | 7.14 | 13.85 | - |
| **T8** | 6.16 | 2.24 | 2.68 | 4.90 | 4.28 | 1.51 | 7.50 | 13.82 | - |
| **T9** | 6.07 | 2.40 | 2.64 | 4.97 | 4.24 | 1.66 | 7.48 | 13.23 | - |
| **G10** | 5.91 | 2.55 | 2.64 | 4.92 | 4.39 | - | 7.68 | 12.24 |  |
| **C11** | 6.04 | 2.28 | 2.56 | 4.74 | 4.29 | 5.18 | 7.45 | - | 6.48, 8.33 |
| **C12** | 6.17 | 2.13 | 2.29 | 4.49 | 4.05 | 5.42 | 7.51 | - |  |
| **G13** | 5.56 | 4.81 | - | 4.27, 4.51 | | - | 7.89 |  |  |
| **G14** | 5.80 | 4.58 | - | 4.49 | | - | 7.52 | 13.12 |  |
| **C15** | 5.41 | 4.57 | - | 4.43, 4.50 | | 5.28 | 7.61 | - | 6.79, 8.22 |
| **A16** | 5.82 | 4.61 | - | 4.71 | | 6.80 | 8.00 | - |  |
| **A17** | 5.81 | 4.61 | - |  | | 7.33 | 7.93 | - |  |
| **A18** | 5.82 | 4.52 | - | 4.82 | | 7.77 | 7.91 | - |  |
| **U19** | 5.37 | 4.39 | - |  | | 5.03 | 7.61 | 13.92 | - |
| **U20** | 5.63 | 4.42 | - | 4.47 | | 5.55 | 8.10 | 13.93 | - |
| **U21** | 5.64 | 4.55 | - | 4.64 | | 5.70 | 8.15 | 13.26 | - |
| **A22** | 5.99 | 4.63 | - |  | | 6.85 | 8.17 | - |  |
| **G23** | 5.46 | 4.39 | - | 4.44 | | - | 7.19 | 12.99 |  |
| **G24** | 5.83 | 4.04 | - | 4.21 | | - | 7.30 |  |  |

1. ***Shifts were measured at 25 oC for sample in 10 mM phosphate buffer, 100 mM NaC, D2O solution. Shifts were referenced to residual HOD peak at 4.8 ppm.***

**** Exchangeable proton shifts were measured at 15 oC.***

***S2*.** Chemical shift assignments for (**1**) the 3’-S-phosphorothiolate modified DNA:RNA hybrida

|  | **Chemical shifts of protons/ppm** | | | | | | | | |
| --- | --- | --- | --- | --- | --- | --- | --- | --- | --- |
| **Residue** | **H1’** | **H2’** | **H2’’** | **H3’** | **H4’** | H5/Me/H2 | **H6/H8** | **Imino*** | **Amino*** |
| **C1** | 5.96 | 2.58 | 2.66 | 4.68 | 4.18 | 6.08 | 8.06 | - |  |
| **C2** | 6.06 | 2.42 | 2.70 | 4.79 | 4.30 | 5.69 | 7.81 | - | 7.07, 8.68 |
| **T3** | 6.02 | 2.36 | 2.70 | 4.95 | 4.27 | 1.63 | 7.63 | 13.34 | - |
| **A4** | 6.03 | 2.62 | 2.84 | 5.06 | 4.41 | 6.49 | 8.14 | - |  |
| **A5** | 5.96 | 2.67 | 2.77 | 5.01 | 4.43 | 7.00 | 7.95 | - |  |
| **A6** | 6.12 | 2.56 | 2.79 | 4.80 | 4.40 | 7.61 | 7.82 | - |  |
| **T7** | 5.86 | 2.25 | 2.59 | 4.72 | 4.22 | 1.19 | 7.18 | 13.82 | - |
| **T8** | 5.97 | 2.47 | 2.68 | 3.61 | 4.14 | 1.53 | 7.58 | 13.84 | - |
| **T9** | 6.07 | 2.48 | 2.66 | 4.93 | 4.33 | 1.64 | 7.81 | 13.18 | - |
| **G10** | 5.94 | 2.54 | 2.63 | 4.88 | 4.36 | - | 7.73 | 12.30 |  |
| **C11** | 6.02 | 2.28 | 2.55 | 4.73 | 4.27 | 5.19 | 7.47 | - | 6.56, 8.40 |
| **C12** | 6.16 | 2.13 | 2.29 | 4.48 | 4.04 | 5.42 | 7.52 | - |  |
| **G13** | 5.63 | 4.84 | - |  | | - | 7.94 |  |  |
| **G14** | 5.83 | 4.55 | - | 4.50 | | - | 7.56 | 13.18 |  |
| **C15** | 5.45 | 4.58 | - |  | | 5.28 | 7.65 | - | 6.79, 8.33 |
| **A16** | 5.83 | 4.61 | - | 4.52 | | 6.81 | 7.97 | - |  |
| **A17** | 5.75 | 4.58 | - | 4.52, 4.69 | | 7.22 | 7.86 | - |  |
| **A18** | 5.80 | 4.51 | - |  | | 7.69 | 7.86 | - |  |
| **U19** | 5.34 | 4.37 | - |  | | 5.00 | 7.58 | 13.89 | - |
| **U20** | 5.61 | 4.39 | - |  | | 5.52 | 8.08 | 13.90 | - |
| **U21** | 5.63 | 4.53 | - |  | | 5.69 | 8.14 | 13.25 | - |
| **A22** | 5.98 | 4.61 | - | 4.73 | | 6.83 | 8.16 | - |  |
| **G23** | 5.46 | 4.38 | - | 4.42 | | - | 7.18 | 13.01 |  |
| **G24** | 5.82 | 4.02 | - | 4.20 | | - | 7.30 |  |  |

1. ***Shifts were measured at 25 oC for sample in 10 mM phosphate buffer, 100 mM NaC, D2O solution. Shifts were referenced to residual HOD peak at 4.8 ppm.***

**** Exchangeable proton shifts were measured at 15 oC.***

***S3*.** Contour plots of the H1’-H2’/H2” region of the TOCSY (**A**) and NOESY (**B**) spectra recorded for (**1**) and (**2**).


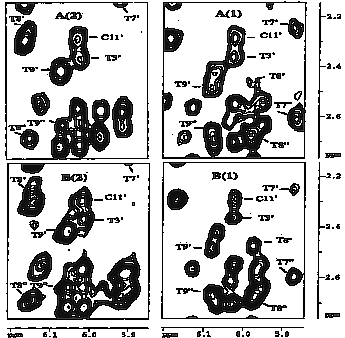


***S4***. Sections of the NOESY spectrum recorded for (**2**) (left hand side) and (**1**) (right hand side) with cross-sections illustrating the relative intensities of the H2 to H1’ nOe connections.


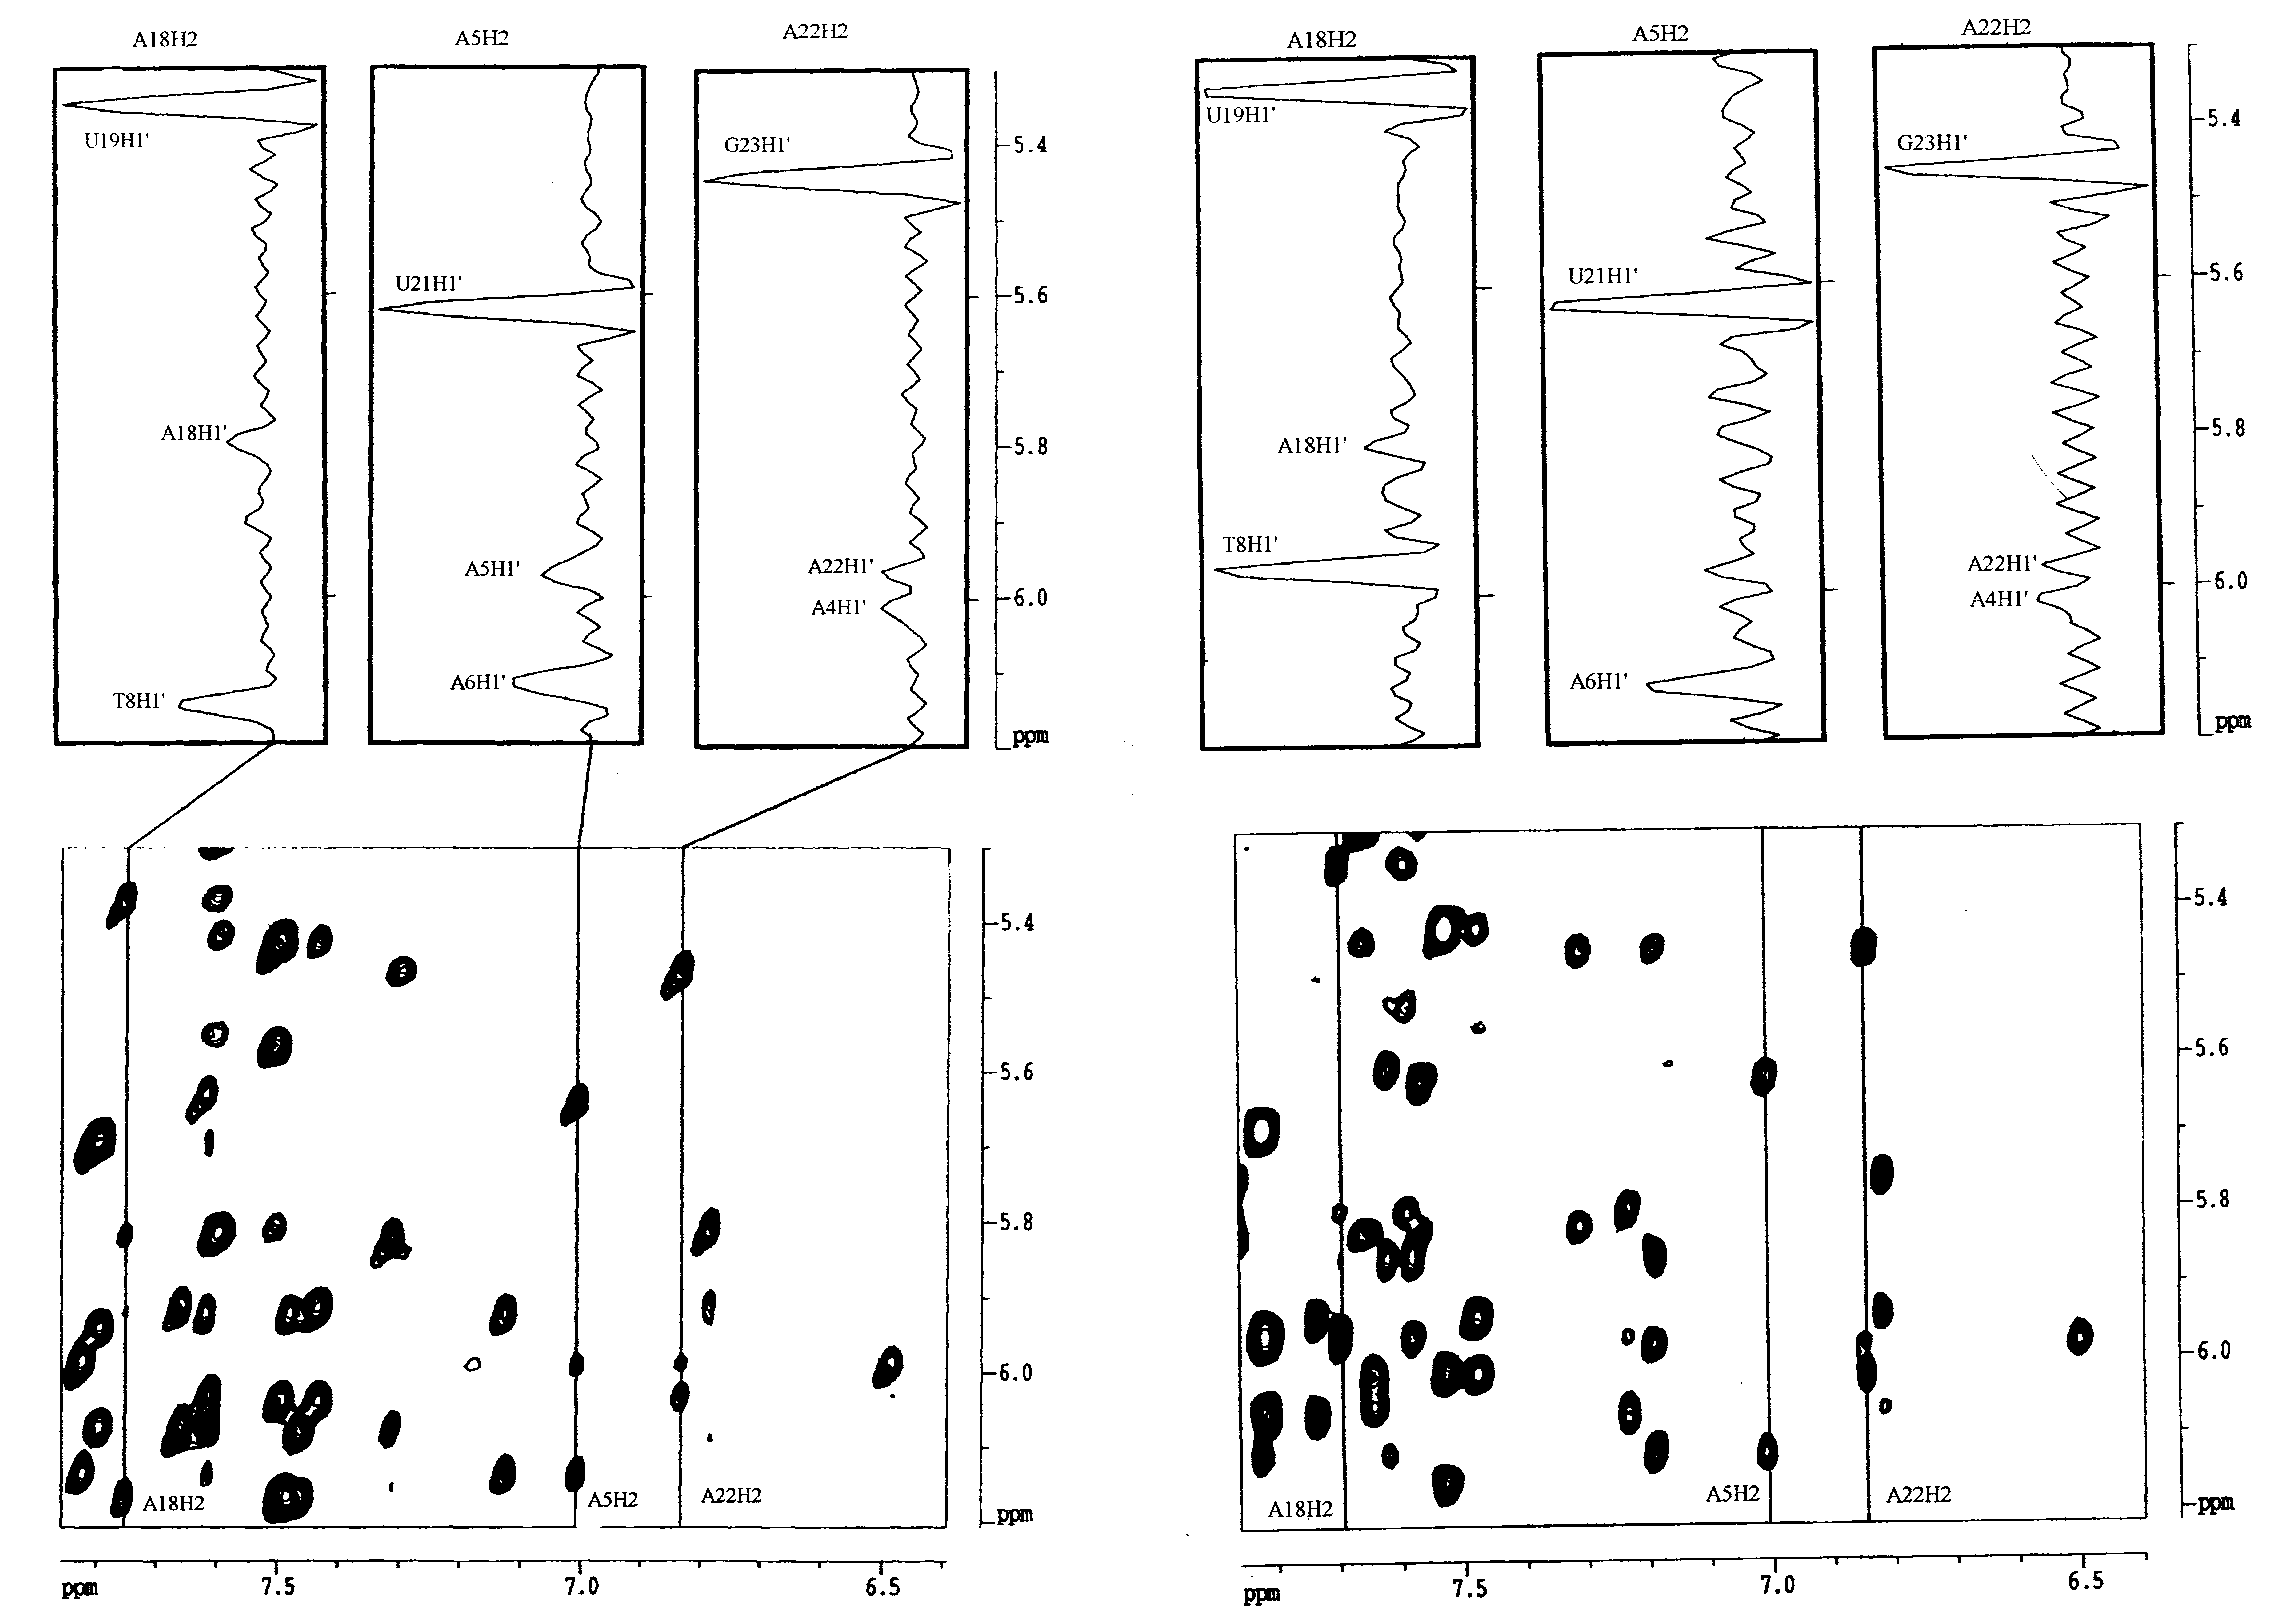


***S5.*** Sections of the PE-COSY spectrum recorded for (**2**) (A) and (**1**) (B) containing the H1’-H2’, and H1’-H2” connections. The boxed region in (B) indicates the chemical shift T8H2’


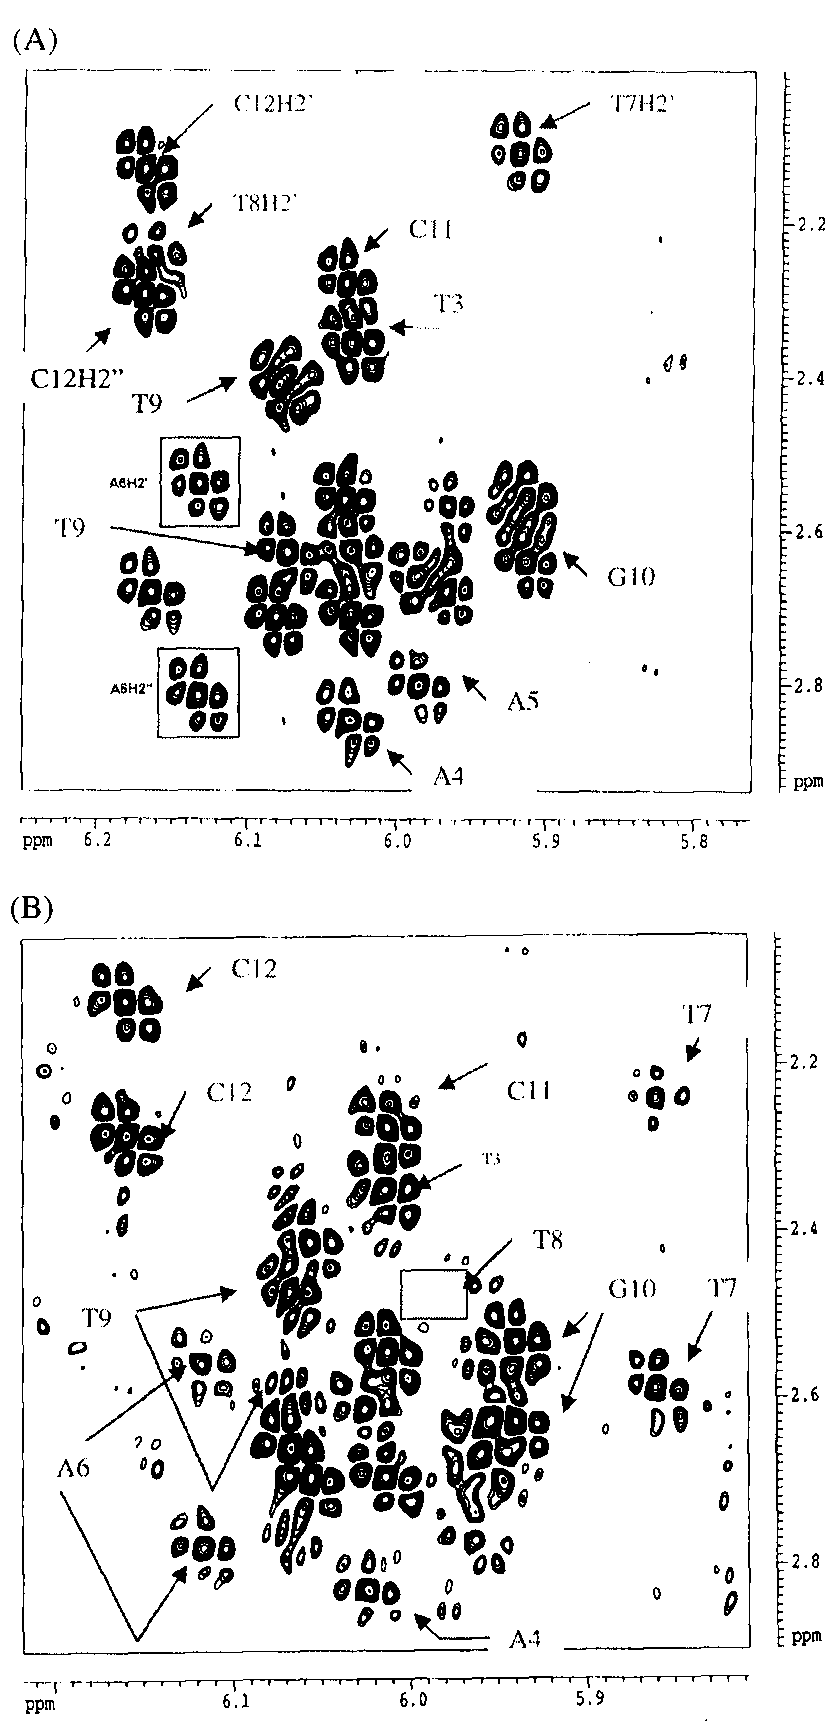


.

***S6***. UV thermal melting curves for the natural hybrid (**2**) and the modified hybrid (**1**).

***S7***. UV thermal melting temperatures, and temperature differences.


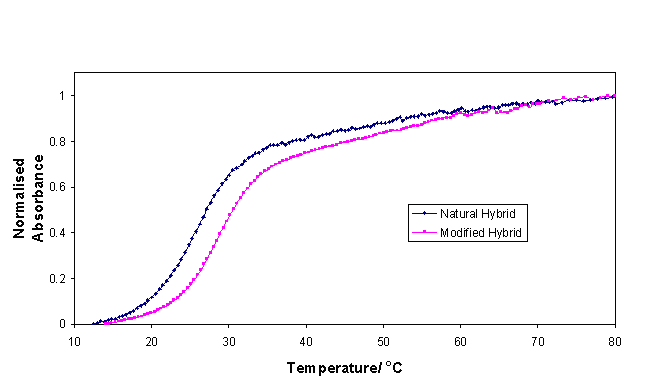


| **Entry No** | **Duplex** | **Tm, oC** | **Tm/mod, oC** |
| --- | --- | --- | --- |
| 2 | d(CCTAAATTTGCC)  r(GGAUUUAAACGG) | 25.2 | - |
| 3 | d(CCTAAATTTGCC)  r(GGAUUUAAACGG) | 26.5 | 1.3 |
| 1 | d(CCTAAATTTGCC)  r(GGAUUUAAACGG) | 26.8 | 1.6 |
| 4 | d(CCTAAATTTGCC)  r(GGAUUUAAACGG) | 26.5 | 1.3 |
| 5 | d(CCTAAATTTGCC)  r(GGAUUUAAACGG) | 28.8 | 1.8 |
| 6 | d(CCTAAATTTGCC)  r(GGAUUUAAACGG) | 28.8 | 1.8 |
| 7 | d(CCTAAATTTGCC)  r(GGAUUUAAACGG) | 29.2 | 2.0 |

T – indicates the residue to which the 3’-S-link is attached.
